# Supplementary material for: Somatic Mutations in Benign Breast Disease Tissues and Association With Breast Cancer Risk&nbsp;
Source: Research Square preprint supplement (doi:10.21203/rs.3.rs-257991/v1), 2021-02-26
Supplement: Supplementary file 1 [file b833380888b8f7fb2ce2fa17.xlsx]

## Sheet: in
subject_pk	group	plate	excluded.sample	grp	total	N. Excluded Variants	N. Non-Excluded Variants	N. Not PASS variants	N. PASS variants	N. Total Variants	Mean UMT	Mean MT	Mean DP	Mean UMT/Mean DP	Genotype Call Rate Non-excl SNPs	year	z_age	z_age_cat1	z_impress	z_atrophy	z_fibros	z_fibrod	z_cohort	z_bside	z_fzn_follow_years	epithelium_pct	fibrotic_stroma_pct	adipose_pct	jodi_comments	jodi_grp	jodi_pash
338	Reference Control	3	FALSE	Non-study sample	45	3888	242	636	3494	4130	964.362	1048.03	13365.7	0.0721521	0.984127	1999	44	<45					Cohort III	Left	0
338	Reference Control	2	FALSE	Non-study sample	43.75	1765	266	349	1682	2031	404.687	452.429	10417.6	0.0388464	0.968912	1999	44	<45					Cohort III	Left	0
338	Reference Control	4	FALSE	Non-study sample		1408	282	356	1334	1690	311.764	343.31	11685.9	0.0266788	0.917391	1999	44	<45					Cohort III	Left	0
338	Reference Control	5	FALSE	Non-study sample		1878	280	380	1778	2158	408.023	444.207	14777.5	0.027611	0.929461	1999	44	<45					Cohort III	Left	0
50090	ER negative	4	FALSE	Study Sample	39.963	10115	1629	3328	8416	11744	199.427	239.234	5894.99	0.03383	0.857143	1985	79	>55	NP	Complete	Yes	No	Cohort II	Left	5.18	10	50	40		majority
50154	ER positive	5	FALSE	Study Sample	59.94	4924	307	557	4674	5231	699.77	790.646	12776.3	0.054771	0.977143	1975	50	45-55	NP	Complete	Yes	No	Cohort I	Right	11.68	20	40	40		majority
50170	ER negative	2	TRUE	Study Sample	0.818	0	4	4	0	4	6	18.25	287.5	0.0208696	1	1970	63	>55	PDWA	Partial	Yes	No	Cohort I	Bilateral	12.31	30	50	20		majority
50170	ER negative	4	FALSE	Study Sample	59.78	824	457	295	986	1281	236.183	291.924	4631.32	0.050997	0.895161	1970	63	>55	PDWA	Partial	Yes	No	Cohort I	Bilateral	12.31	30	50	20		majority
50344	Cancer Free at 16 years	3	FALSE	Study Sample	40.43	16202	681	3033	13850	16883	299.957	360.001	6144.35	0.0488184	0.859873	1983	49	45-55	NP	Partial	Yes	No	Cohort II	Right	25.39	40	40	20		majority
50344	Cancer Free at 16 years	2	FALSE	Study Sample	59.09	22020	505	5344	17181	22525	434.957	548.23	4381.24	0.0992771	0.916318	1983	49	45-55	NP	Partial	Yes	No	Cohort II	Right	25.39	40	40	20		majority
50353	ER positive	4	TRUE	Study Sample	60.024	0	171	67	104	171	20.6784	33.8538	939.082	0.0220198	0.644231	1980	45	45-55	NP	Partial	No	No	Cohort I	Right	6.7	30	30	40		majority
50559	ER negative	2	FALSE	Study Sample	59.84	15277	502	1936	13843	15779	545.707	675.338	3394.27	0.160773	0.917391	1983	46	45-55	PDWA	None	Yes	No	Cohort II	Bilateral	3.18	40	40	20		majority
50590	Cancer Free at 16 years	2	FALSE	Study Sample	40.068	4434	363	954	3843	4797	685.023	797.889	8546.67	0.0801508	0.960474	1974	60	>55	PDWA	Partial	Yes	Yes	Cohort I	Right	18.57	40	30	30		majority
50785	ER positive	2	TRUE	Study Sample	40.2	0	257	122	135	257	13.9883	18.2257	6559.86	0.00213241	0.626168	1974	54	45-55	AH	Complete	Yes	No	Cohort I	Left	7.42
50823	Cancer Free at 16 years	4	TRUE	Study Sample	60.26	2308	938	1308	1938	3246	111.078	134.637	6853.42	0.0162077	0.723529	1987	46	45-55	NP	Partial	Yes	No	Cohort II	Left	31.3	30	30	40		majority
50931	Cancer Free at 16 years	5	TRUE	Study Sample	60.06	640	1539	599	1580	2179	74.7861	107.34	3966.87	0.0188527	0.757098	1972	59	>55	PDWA	Partial	Yes	No	Cohort I	Right	32.22	20	30	50		majority
50940	ER positive	2	FALSE	Study Sample	21	3834	459	980	3313	4293	264.529	302.259	7849.54	0.0336999	0.896825	1972	61	>55	PDWA	Complete	Yes	No	Cohort I	Left	12.31	50	20	30		majority
51001	Cancer Free at 16 years	2	TRUE	Study Sample	0.955	0	37	37	0	37	8.67568	12.7027	26.7838	0.323915	0.857143	1976	60	>55	PDWA	None	Yes	No	Cohort I	Bilateral	21.82
51055	ER positive	5	FALSE	Study Sample	60.416	16924	331	2923	14332	17255	807.433	877.321	55432.9	0.0145659	0.969957	1982	74	>55	NP		No	No	Cohort II	Left	11.05	20	20	60		majority
51154	ER positive	5	FALSE	Study Sample	59.976	963	394	516	841	1357	274.756	330.558	3345.74	0.0821212	0.920833	1988	71	>55	PDWA	Partial	Yes	No	Cohort II	Right	0.75	20	40	40		majority
51189	Cancer Free at 16 years	3	FALSE	Study Sample	62.3	8683	372	2749	6306	9055	773.707	891.03	7684.1	0.100689	0.923077	1984	49	45-55	NP	None	No	Yes	Cohort II	Right	34.41	50	40	10	Stromal FA	fibroadenoma	1
51193	ER negative	4	TRUE	Study Sample	20.02	65	678	468	275	743	37.2948	43.3419	6020.5	0.00619463	0.604167	1984	55	45-55	NP	Complete	Yes	No	Cohort II	Left	12.13	10	50	40		majority
51469	ER negative	2	FALSE	Study Sample	19.98	3561	355	746	3170	3916	419.368	477.991	13277	0.0315861	0.93722	1970	35	<45	PDWA	Partial	Yes	No	Cohort I	Right	13.11	40	50	10		majority
51533	Cancer Free at 16 years	4	FALSE	Study Sample	60.5	1885	484	557	1812	2369	199.119	235.541	9553.24	0.0208431	0.8223	1971	42	<45	PDWA	None	Yes	No	Cohort I	Bilateral	27.55	40	40	20		majority
51691	ER positive	4	FALSE	Study Sample	39.952	3716	334	840	3210	4050	462.162	524.612	12425.5	0.0371946	0.948357	1988	60	>55	PDWA	Complete	Yes	No	Cohort II	Left	10.86	10	40	50		majority
52242	Cancer Free at 16 years	3	TRUE	Study Sample	20	578	1079	514	1143	1657	103.634	131.566	3113.07	0.0332899	0.61516	1990	64	>55	PDWA	Complete	Yes	No	Cohort II	Left	21.6	20	40	40		fibroadenoma
52242	Cancer Free at 16 years	2	TRUE	Study Sample	1.25	0	7	0	7	7	6	6.57143	12.4286	0.482759	1	1990	64	>55	PDWA	Complete	Yes	No	Cohort II	Left	21.6	20	40	40		fibroadenoma
52370	ER negative	3	FALSE	Study Sample	22.56	1839	541	760	1620	2380	138.368	174.561	2189.26	0.0632031	0.824268	1983	46	45-55	PDWA	Partial	Yes	No	Cohort II	Left	2.48	60	30	10		fibroadenoma	1
52437	ER negative	2	FALSE	Study Sample	19.864	1841	372	691	1522	2213	565.323	678.702	9058.83	0.0624058	0.970297	1990	43	<45	NP	Partial	Yes	No	Cohort II	Right	7.21	10	80	10		majority
52461	Cancer Free at 16 years	3	FALSE	Study Sample	20.61	3479	711	1322	2868	4190	166.401	188.246	8645.93	0.0192461	0.818471	1990	53	45-55	NP	None	Yes	No	Cohort II	Right	28.33	20	20	60		majority
52674	ER positive	5	FALSE	Study Sample	59.95	22167	633	5682	17118	22800	492.616	568.321	6184.79	0.0796496	0.952899	1988	61	>55	PDWA	Partial	Yes	No	Cohort II	Right	8.98	40	30	30		majority
52713	ER positive	5	FALSE	Study Sample	60.032	37249	446	6736	30959	37695	814.672	920.598	9320.02	0.0874109	0.908088	1983	57	>55	NP	Partial	Yes	No	Cohort II	Left	20.68	10	70	20		majority
52882	Cancer Free at 16 years	5	FALSE	Study Sample	60.114	6295	781	2339	4737	7076	275.36	336.531	7328.75	0.0375725	0.846154	1973	51	45-55	NP	Partial	Yes	No	Cohort I	Bilateral	33.63	10	80	10		majority
52900	Cancer Free at 16 years	2	FALSE	Study Sample	17.15	2866	593	985	2474	3459	213.921	256.807	10736.2	0.0199252	0.869919	1985	56	>55	NP	Partial	Yes	Yes	Cohort II	Left	33.1	30	30	40		majority
53143	Cancer Free at 16 years	3	FALSE	Study Sample	60	1624	1401	1184	1841	3025	58.0311	69.2175	4058.27	0.0142995	0.810909	1984	42	<45	PDWA	None	Yes	No	Cohort II	Left	34.12	50	40	10	this is listed as section 16 by FL, but when scanned reads as section 3	majority
53298	Cancer Free at 16 years	2	FALSE	Study Sample	19.968	2538	744	995	2287	3282	183.082	216.897	6041.34	0.0303048	0.852941	1976	54	45-55	PDWA	Partial	Yes	No	Cohort I	Right	38.73	20	70	10		fibroadenoma	1
53342	ER negative	3	FALSE	Study Sample	62.82	24570	567	7888	17249	25137	721.813	850.178	5703.79	0.12655	0.945848	1984	41	<45	PDWA		Yes	Yes	Cohort II	Left	11.42	40	50	10	two x's added in front of Fibroadenoma!	fibroadenoma
53342	ER negative	2	FALSE	Study Sample	62.82	19216	431	2575	17072	19647	828.528	1003.25	3550.68	0.233343	0.960317	1984	41	<45	PDWA		Yes	Yes	Cohort II	Left	11.42	40	50	10	two x's added in front of Fibroadenoma!	fibroadenoma
53406	ER negative	4	FALSE	Study Sample	40.077	1670	356	553	1473	2026	309.803	350.511	9999.87	0.0309807	0.93913	1984	65	>55	NP	Partial	Yes	No	Cohort II	Left	3.82	10	50	40		majority
53487	ER negative	2	FALSE	Study Sample	19.9	478	526	370	634	1004	80.3048	97.3207	6897	0.0116434	0.85259	1991	48	45-55	AH	None	Yes	No	Cohort II	Right	9.07	30	20	50		majority
53566	ER negative	3	FALSE	Study Sample	62.48	20154	360	6459	14055	20514	1005.32	1161.34	7397.59	0.135898	0.912214	1990	48	45-55	PDWA		Yes	No	Cohort II	Left	10.63	30	60	10		fibroadenoma	1
53677	ER negative	5	TRUE	Study Sample	60.196	747	865	629	983	1612	65.853	86.4051	4345.47	0.0151544	0.803333	1986	73	>55	NP		No	No	Cohort II	Left	12.31				Exclude SKIN	exceptions
53835	ER negative	4	TRUE	Study Sample	19.987	1	487	300	188	488	25.9324	40.6988	7996.69	0.00324289	0.561151	1979	63	>55	NP	Complete	Yes	No	Cohort I	Left	14.47	10	60	30	Inflammation	exceptions
54038	ER negative	2	FALSE	Study Sample	39.9	3273	432	1115	2590	3705	706.073	866.709	10692.5	0.0660347	0.97619	1989	52	45-55	PDWA	None	Yes	No	Cohort II	Right	2.61	20	60	20		majority
54116	Cancer Free at 16 years	3	FALSE	Study Sample	20.44	8158	1847	3153	6852	10005	118.13	145.692	5156.22	0.0229103	0.814385	1980	47	45-55	PDWA	None	Yes	No	Cohort I	Left	16.83	20	60	20		majority
54385	ER positive	5	FALSE	Study Sample	40.04	2055	957	1014	1998	3012	110.799	134.34	5133.11	0.0215853	0.811494	1973	49	45-55	NP	Partial	No	Yes	Cohort I	Left	3.33	20	20	60		fibroadenoma
54575	ER positive	3	FALSE	Study Sample	39.55	5836	513	1863	4486	6349	527.585	599.523	8150.22	0.0647327	0.914384	1976	38	<45	NP	None	No	Yes	Cohort I	Right	5.97	20	70	10		fibroadenoma
54596	Cancer Free at 16 years	3	FALSE	Study Sample	20.655	15100	911	3754	12257	16011	318.47	369.025	7120.2	0.0447277	0.873457	1988	51	45-55	PDWA	Partial	No	No	Cohort II	Right	30.37	30	30	40		majority
54775	Cancer Free at 16 years	2	FALSE	Study Sample	19.869	1339	592	690	1241	1931	197.451	282.053	5890.57	0.0335199	0.835391	1985	29	<45	PDWA	Partial	Yes	No	Cohort II	Left	33.25	30	30	40		majority
55038	Cancer Free at 16 years	3	FALSE	Study Sample	60.48	1408	502	558	1352	1910	216.681	248.37	3483.67	0.062199	0.873563	1969	50	45-55	PDWA	None	Yes	Yes	Cohort I	Bilateral	32.51	40	50	10		fibroadenoma
55365	ER negative	5	FALSE	Study Sample	59.924	1747	356	468	1635	2103	316.9	356.905	7853.94	0.0403491	0.926641	1970	56	>55	NP	Partial	Yes	No	Cohort I	Right	12.85	10	20	70		majority
55370	ER positive	3	FALSE	Study Sample	21.72	5313	445	1504	4254	5758	406.094	448.33	9717.16	0.0417914	0.900369	1973	49	45-55	PDWA	Partial	Yes	No	Cohort I	Bilateral	8.74	30	60	10		majority
55507	ER positive	5	FALSE	Study Sample	59.998	3931	402	910	3423	4333	331.567	389.392	9238.96	0.0358879	0.883721	1983	65	>55	NP	Complete	No	No	Cohort II	Left	12.44	10	10	80		majority
55900	ER negative	2	FALSE	Study Sample	39.951	3776	383	1092	3067	4159	311.742	411.204	4382.5	0.0711334	0.898496	1976	43	<45	PDWA	None	No	No	Cohort I	Left	14.98	20	30	50		majority
55952	ER positive	2	FALSE	Study Sample	20.57	3502	862	1096	3268	4364	168.604	202.106	4821.79	0.034967	0.886598	1974	29	<45	NP	Partial	Yes	Yes	Cohort I	Left	13.62	20	60	20		fibroadenoma
56044	Cancer Free at 16 years	3	FALSE	Study Sample	59.67	1337	420	411	1346	1757	203.552	243.278	7484.22	0.0271975	0.860656	1971	23	<45	NP		Not Available	Yes	Cohort I	Left	33.68	30	70	0		fibroadenoma
56229	ER negative	5	FALSE	Study Sample	59.4	1950	340	402	1888	2290	255.125	301.872	5005.34	0.0509706	0.889362	1977	54	45-55	PDWA	Partial	Yes	No	Cohort I	Left	6.56	20	60	20		majority
56272	Cancer Free at 16 years	5	FALSE	Study Sample	20.001	2933	1057	940	3050	3990	111.473	137.286	9981	0.0111686	0.867521	1986	73	>55	NP	Complete	Yes	No	Cohort II	Left	23.14	10	50	40		majority
56287	Cancer Free at 16 years	3	FALSE	Study Sample	40.35	1689	534	531	1692	2223	179.109	214.051	6285.04	0.0284977	0.813149	1972	40	<45	NP		Not Available	Yes	Cohort I	Right	29.85	20	70	10		fibroadenoma
56287	Cancer Free at 16 years	2	FALSE	Study Sample	59.987	4224	497	1190	3531	4721	464.851	573.981	5305.58	0.0876155	0.922509	1972	40	<45	NP		Not Available	Yes	Cohort I	Right	29.85	20	70	10		fibroadenoma
56607	ER negative	3	FALSE	Study Sample	61.23	1529	375	397	1507	1904	279.784	325.225	6093.56	0.0459147	0.90873	1976	40	<45	NP	None	Yes	No	Cohort I	Left	8.01	10	70	20		majority
56607	ER negative	2	FALSE	Study Sample	61.23	4570	378	736	4212	4948	859.122	997.121	12083.4	0.0710994	0.960938	1976	40	<45	NP	None	Yes	No	Cohort I	Left	8.01	10	70	20		majority
56927	ER positive	5	FALSE	Study Sample	59.965	3198	591	1402	2387	3789	162.548	209.22	1908.43	0.0851738	0.813008	1984	72	>55	PDWA	Partial	Yes	No	Cohort II	Left	2.06	20	40	40		majority
57073	ER negative	5	FALSE	Study Sample	60	3192	916	992	3116	4108	254.492	298.619	6564.27	0.0387693	0.875433	1974	58	>55	NP	Complete	Yes	No	Cohort I	Left	10.14	10	80	10		majority
57098	ER positive	4	TRUE	Study Sample	20.025	43	586	185	444	629	30.0556	41.8696	4105.5	0.00732082	0.77907	1975	60	>55	NP	Complete	Yes	No	Cohort I	Right	14.57	10	20	70		majority
57350	Cancer Free at 16 years	3	FALSE	Study Sample	20.325	8121	1274	2457	6938	9395	157.304	187.288	7890.47	0.0199359	0.906061	1988	42	<45	NP	Partial	Yes	No	Cohort II	Left	30.68	10	60	30		fibroadenoma	1
57357	ER positive	3	FALSE	Study Sample	57.06	2843	508	903	2448	3351	302.629	354.315	8069.51	0.0375028	0.867347	1975	46	45-55	AH	Partial	Yes	Yes	Cohort I	Left	7.64	40	50	10	LCIS	fibroadenoma
57844	ER positive	4	TRUE	Study Sample	20.007	372	1950	791	1531	2322	37.7674	52.6813	5251.84	0.00719127	0.604478	1976	62	>55	NP	Partial	Yes	No	Cohort I	Left	7.68	10	80	10		majority
58161	Cancer Free at 16 years	4	TRUE	Study Sample	60.198	1587	850	964	1473	2437	120.959	141.22	4309.09	0.0280708	0.634218	1981	52	45-55	PDWA	Partial	Yes	No	Cohort I	Left	36.44	20	20	60		majority
58518	ER negative	3	FALSE	Study Sample	63.84	7022	549	1446	6125	7571	216.517	269.109	7226.23	0.0299626	0.875458	1991	40	<45	NP		Not Available	Yes	Cohort II	Right	10.59	40	60	0		fibroadenoma	1
58518	ER negative	2	FALSE	Study Sample	63.84	21860	421	3107	19174	22281	524.982	692.179	10910.9	0.0481154	0.942387	1991	40	<45	NP		Not Available	Yes	Cohort II	Right	10.59	40	60	0		fibroadenoma	1
58549	Cancer Free at 16 years	5	TRUE	Study Sample	60.102	0	892	256	636	892	21.5381	28.7489	3087.3	0.00697636	0.641176	1981	59	>55	PDWA	None	Yes	No	Cohort I	Left	16.7	20	30	50		majority
58706	ER positive	5	TRUE	Study Sample	20.016	242	710	414	538	952	80.2374	101.791	11975	0.00670041	0.632353	1978	38	<45	NP	Partial	Yes	Yes	Cohort I	Left	3.99	20	60	20		fibroadenoma
58858	ER positive	3	FALSE	Study Sample	20.72	18285	634	5977	12942	18919	448.398	521.377	4962.44	0.0903584	0.93133	1990	64	>55	PDWA	Partial	Yes	No	Cohort II	Left	4.83	30	50	20		majority
59138	ER positive	2	TRUE	Study Sample	19.84	485	1985	780	1690	2470	96.2721	147.254	4194.91	0.0229497	0.66443	1987	53	45-55	AH	Partial	Yes	Yes	Cohort II	Right	14.95	20	40	40		majority
59138	ER positive	4	FALSE	Study Sample	60.68	5082	688	1827	3943	5770	159.211	209.36	5233.98	0.0304187	0.844262	1987	53	45-55	AH	Partial	Yes	Yes	Cohort II	Right	14.95	20	40	40		majority
59318	ER positive	4	FALSE	Study Sample	59.84	9394	1205	2683	7916	10599	176.997	210.402	9212.47	0.0192128	0.841176	1988	45	45-55	NP	None	No	Yes	Cohort II	Right	12.96	10	50	40		fibroadenoma
59406	ER positive	5	FALSE	Study Sample	60.152	10114	948	3274	7788	11062	276.586	328.095	7252.68	0.0381357	0.806061	1986	63	>55	PDWA	Partial	Yes	Yes	Cohort II	Left	0.85	30	50	20		majority
59597	ER positive	4	FALSE	Study Sample	59.84	21325	689	4724	17290	22014	426.377	500.749	6797.39	0.0627265	0.918644	1988	59	>55	AH	Partial	Yes	No	Cohort II	Left	7.31	10	30	60		majority
59666	ER negative	5	FALSE	Study Sample	40.005	1820	1447	982	2285	3267	377.275	507.526	7169.4	0.0526229	0.890688	1989	53	45-55	NP	Complete	Yes	No	Cohort II	Left	11.48	10	20	70		majority
59779	Cancer Free at 16 years	3	FALSE	Study Sample	61.3	2916	324	872	2368	3240	718.65	814.002	8285.57	0.0867351	0.965665	1982	50	45-55	PDWA	None	Yes	No	Cohort II	Right	29.57	30	40	30		majority
59779	Cancer Free at 16 years	2	FALSE	Study Sample	61.3	2038	297	373	1962	2335	909.168	1040.42	4457.21	0.203977	0.978166	1982	50	45-55	PDWA	None	Yes	No	Cohort II	Right	29.57	30	40	30		majority
59897	ER negative	4	FALSE	Study Sample	59.878	6561	864	1855	5570	7425	173.318	208.373	6418.23	0.027004	0.880282	1988	38	<45	PDWA	Partial	Yes	No	Cohort II	Left	13.38	10	40	50		majority
59908	ER positive	3	FALSE	Study Sample	40.56	36969	760	8848	28881	37729	790.693	955.11	8018	0.0986148	0.881789	1982	49	45-55	AH	Partial	Yes	Yes	Cohort II	Left	6.67	20	60	20		majority
59965	ER negative	4	FALSE	Study Sample	59.976	3831	1065	1194	3702	4896	267.163	338.834	5775.14	0.0462608	0.905579	1989	74	>55	AH	Complete	No	Yes	Cohort II	Left	6.8	10	10	80		majority
60137	ER positive	2	FALSE	Study Sample	40	16880	830	7256	10454	17710	588.547	738.318	4155.81	0.14162	0.955466	1986	47	45-55	PDWA	Partial	Yes	Yes	Cohort II	Right	4.99	10	30	60		fibroadenoma
60165	ER positive	4	FALSE	Study Sample	20.02	2410	2280	1610	3080	4690	76.8247	93.3552	7714.29	0.00995876	0.80163	1983	63	>55	NP	Complete	Yes	No	Cohort II	Left	10.81	10	40	50		majority
60389	ER positive	3	FALSE	Study Sample	60.96	18811	538	7540	11809	19349	617.111	736.026	4449.66	0.138687	0.958015	1989	54	45-55	PDWA	None	Yes	No	Cohort II	Left	4.02	40	30	30		majority
60594	ER positive	4	FALSE	Study Sample	59.92	12661	867	2308	11220	13528	306.48	362.456	12613.5	0.0242978	0.860841	1988	72	>55	NP	Complete	Yes	Yes	Cohort II	Left	12.34	10	70	20		majority
60603	ER negative	3	FALSE	Study Sample	61.07	11652	597	2591	9658	12249	386.724	464.913	6206.71	0.0623073	0.838596	1988	48	45-55	PDWA	None	Yes	No	Cohort II	Right	8.55	20	60	20		majority
61230	ER negative	5	FALSE	Study Sample	39.96	8216	405	1585	7036	8621	320.641	372.75	6271.69	0.051125	0.886275	1987	47	45-55	NP	Partial	Yes	No	Cohort II	Right	1.95	10	50	40		majority
61294	ER positive	3	TRUE	Study Sample	20.7	960	1762	1164	1558	2722	43.8035	55.0331	4191.35	0.0104509	0.777027	1988	65	>55	PDWA	Partial	Yes	Yes	Cohort II	Right	8.51	20	20	60		fibroadenoma
61364	ER negative	3	FALSE	Study Sample	65.24	8947	713	2160	7500	9660	263.449	314.209	6026.64	0.043714	0.887681	1988	22	<45	NP	None	No	Yes	Cohort II	Left	9.63	50	40	10		fibroadenoma
61456	ER positive	3	FALSE	Study Sample	59.78	12333	582	2620	10295	12915	315.619	365.175	6838.73	0.0461518	0.854406	1988	32	<45	NP		Not Available	Yes	Cohort II	Right	5.95	20	60	20		fibroadenoma
61456	ER positive	2	FALSE	Study Sample	59.78	23980	460	8662	15778	24440	714.09	846.472	4938.99	0.144582	0.936364	1988	32	<45	NP		Not Available	Yes	Cohort II	Right	5.95	20	60	20		fibroadenoma
61842	ER positive	2	TRUE	Study Sample	20.305	116	614	256	474	730	37.2822	52.8644	3592.36	0.0103782	0.746032	1990	45	45-55	NP	None	No	Yes	Cohort II	Right	13.85	10	80	10		fibroadenoma
61842	ER positive	4	TRUE	Study Sample	59.85	505	1019	581	943	1524	62.1404	81.0236	3959.77	0.015693	0.696864	1990	45	45-55	NP	None	No	Yes	Cohort II	Right	13.85	10	80	10		fibroadenoma
62041	ER negative	2	FALSE	Study Sample	39.996	15022	672	3350	12344	15694	391.919	488.609	5471.06	0.071635	0.931174	1983	55	45-55	AH	Partial	Yes	No	Cohort II	Right	3.11	10	40	50		majority
63003	Cancer Free at 16 years	4	TRUE	Study Sample	40.014	36	598	188	446	634	33.8801	49.1215	1589.93	0.0213091	0.64486	1993	57	>55	NP	None	Yes	No	Cohort III	Left	25.31	10	40	50		majority
63005	ER negative	5	FALSE	Study Sample	60.144	1676	449	508	1617	2125	228.976	275.334	4767.11	0.0480325	0.923767	1992	64	>55	NP	None	No	No	Cohort III	Left	0.88	10	30	60		majority
63018	Cancer Free at 16 years	5	TRUE	Study Sample	19.98	0	29	4	25	29	7.68966	12.4828	29.7241	0.258701	0.851852	1992	55	45-55	NP	Complete	No	No	Cohort III	Right	25.05
63055	ER negative	3	FALSE	Study Sample	59.85	1948	265	310	1903	2213	1864.26	1997.9	9318.5	0.20006	0.986726	1995	76	>55	PDWA	Complete	No	No	Cohort III	Right	1.36	20	30	50		majority
63098	Cancer Free at 16 years	4	TRUE	Study Sample	59.6	354	1294	474	1174	1648	68.4254	97.9417	4852.11	0.0141022	0.718861	1992	48	45-55	PDWA	None	Yes	No	Cohort III	Right	23.93	50	40	10		majority
63147	Cancer Free at 16 years	5	TRUE	Study Sample	20.01	0	442	160	282	442	19.6719	27.8167	3842.45	0.00511963	0.620438	1993	57	>55	PDWA	Complete	No	Yes	Cohort III	Left	25.62
63365	Cancer Free at 16 years	3	FALSE	Study Sample	61.04	2396	247	510	2133	2643	806.404	927.709	8379.07	0.0962403	0.972973	1994	42	<45	NP	None	Yes	Yes	Cohort III	Left	24.67	40	50	10		fibroadenoma
63365	Cancer Free at 16 years	2	FALSE	Study Sample	61.04	1967	259	571	1655	2226	661.12	776.84	6477.58	0.102063	0.989848	1994	42	<45	NP	None	Yes	Yes	Cohort III	Left	24.67	40	50	10		fibroadenoma
63434	ER positive	2	TRUE	Study Sample	20.088	12	392	148	256	404	24.2772	33.6757	1986.76	0.0122195	0.757764	1992	70	>55	AH	Partial	Yes	No	Cohort III	Left	2.1	20	30	50		majority
63437	ER positive	5	TRUE	Study Sample	60.28	107	392	171	328	499	55.8818	62.483	5194.96	0.0107569	0.631579	1998	64	>55	PDWA	Complete	No	No	Cohort III	Right	6.28	10	30	60		majority
63446	Cancer Free at 16 years	3	FALSE	Study Sample	69	2076	300	481	1895	2376	1237.71	1343.45	11396.3	0.108606	0.983264	1995	41	<45	AH	Complete	No	Yes	Cohort III	Left	20.7	50	20	30		majority
63446	Cancer Free at 16 years	2	FALSE	Study Sample	55.2	3190	296	881	2605	3486	2342.41	2569.97	12842.7	0.182392	0.991597	1995	41	<45	AH	Complete	No	Yes	Cohort III	Left	20.7	50	20	30		majority
63461	ER negative	5	FALSE	Study Sample	59.76	8289	494	2003	6780	8783	338.609	380.639	6288.3	0.0538475	0.911972	1992	75	>55	PDWA	Complete	Yes	No	Cohort III	Left	6.14	10	70	20		majority
63478	ER positive	3	FALSE	Study Sample	62.65	1216	286	391	1111	1502	280.985	311.178	13983.7	0.0200937	0.923077	1999	43	<45	NP	None	Yes	No	Cohort III	Right	7.97	40	50	10		majority
63478	ER positive	2	FALSE	Study Sample	62.65	2336	234	546	2024	2570	1757.05	1926.11	11746.8	0.149577	0.968085	1999	43	<45	NP	None	Yes	No	Cohort III	Right	7.97	40	50	10		majority
63506	Cancer Free at 16 years	5	FALSE	Study Sample	59.904	4282	762	815	4229	5044	705.552	800.664	23773.4	0.0296782	0.97807	1996	72	>55	NP	Complete	No	No	Cohort III	Right	18	0	30	70	No epithelium	exceptions
63515	Cancer Free at 16 years	2	FALSE	Study Sample	19.992	1344	417	625	1136	1761	259.641	323.215	3754.24	0.0691592	0.889313	1992	44	<45	NP	Complete	Yes	No	Cohort III	Left	26.8	10	80	10		majority
63515	Cancer Free at 16 years	4	TRUE	Study Sample	60.21	1529	645	682	1492	2174	113.448	136.915	7123.22	0.0159265	0.786408	1992	44	<45	NP	Complete	Yes	No	Cohort III	Left	26.8	10	80	10		majority
63550	Cancer Free at 16 years	3	TRUE	Study Sample	64.24	551	478	372	657	1029	92.3411	107.962	11570.7	0.0079806	0.738971	1993	72	>55	PDWA	Complete	Yes	Yes	Cohort III	Left	21.64	10	50	40	Bx site	exceptions
63568	ER positive	4	FALSE	Study Sample	59.944	1866	249	278	1837	2115	658.699	743.986	8802.32	0.0748325	0.985437	1996	73	>55	AH	Complete	Yes	No	Cohort III	Bilateral	0.84	10	20	60		majority
63601	Cancer Free at 16 years	2	FALSE	Study Sample	39.974	3221	305	740	2786	3526	475.772	552.882	7452.14	0.0638437	0.926267	1992	47	45-55	PDWA	Complete	No	No	Cohort III	Right	16.05	10	10	80		majority
63649	Cancer Free at 16 years	3	TRUE	Study Sample	20.97	1022	665	720	967	1687	85.3983	99.112	7093.05	0.0120397	0.779783	1992	76	>55	PDWA		Yes	No	Cohort III	Left	19.78	20	20	60		majority
63863	Cancer Free at 16 years	5	FALSE	Study Sample	60.016	2134	248	388	1994	2382	1127.28	1265.21	18299.2	0.0616028	0.980583	1996	55	45-55	NP	Complete	No	No	Cohort III	Left	17.92	10	20	70		majority
64041	ER negative	3	FALSE	Study Sample	61.7	2414	246	581	2079	2660	1245.43	1375.49	10744.6	0.115912	0.984375	1993	51	45-55	PDWA	None	No	Yes	Cohort III	Left	12.34	50	40	10		fibroadenoma	1
64089	Cancer Free at 16 years	3	FALSE	Study Sample	41.6	2683	307	583	2407	2990	617.086	678.607	11673.5	0.0528619	0.965665	1993	63	>55	PDWA	Partial	No	No	Cohort III	Right	14.03	10	20	70		majority
64144	Cancer Free at 16 years	3	FALSE	Study Sample	59.84	2797	313	981	2129	3110	666.955	755.386	6998.19	0.0953039	0.953704	1995	53	45-55	NP	Complete	Yes	No	Cohort III	Right	22.82	20	30	50		majority
64163	ER negative	3	FALSE	Study Sample	60.8	3059	276	578	2757	3335	1680.23	1822.56	15101.3	0.111264	0.972727	1993	43	<45	PDWA	None	Yes	No	Cohort III	Left	1.46	30	40	30		majority
64168	Cancer Free at 16 years	3	FALSE	Study Sample	27.36	5999	555	1622	4932	6554	263.857	301.049	5045.36	0.052297	0.92	1992	23	<45	NP	None	No	Yes	Cohort III	Right	22.17	50	40	10		majority
64216	Cancer Free at 16 years	3	FALSE	Study Sample	42.14	2296	310	376	2230	2606	683.88	769.916	14525.1	0.0470827	0.99095	1996	36	<45	PDWA	Partial	Yes	Yes	Cohort III	Right	22.71	20	40	40		majority
64216	Cancer Free at 16 years	2	FALSE	Study Sample	60.2	4320	287	964	3643	4607	1864.72	2079.19	11581.2	0.161013	0.986301	1996	36	<45	PDWA	Partial	Yes	Yes	Cohort III	Right	22.71	20	40	40		majority
64237	ER negative	2	FALSE	Study Sample	40.26	3434	332	1239	2527	3766	1507.87	1698.12	8721.95	0.172883	0.991968	1999	65	>55	NP	Complete	Yes	No	Cohort III	Right	12.54	10	80	10		majority
64237	ER negative	5	FALSE	Study Sample	60.092	3421	289	398	3312	3710	1398.5	1523.05	15485.8	0.0903082	0.97541	1999	65	>55	NP	Complete	Yes	No	Cohort III	Right	12.54	10	80	10		majority
64272	Cancer Free at 16 years	4	FALSE	Study Sample	60.138	3765	1107	972	3900	4872	605.866	718.525	20240	0.0299341	0.95122	1993	57	>55	PDWA	Complete	No	No	Cohort III	Left	26.17	10	10	80		majority
64323	ER negative	3	FALSE	Study Sample	60.56	1532	238	433	1337	1770	1642.02	1776.41	11370.9	0.144405	0.989796	1997	49	45-55	PDWA	None	Yes	No	Cohort III	Left	2.97	30	50	20		majority
64328	Cancer Free at 16 years	5	FALSE	Study Sample	60.116	1981	223	298	1906	2204	1263.91	1374.2	12511.1	0.101022	0.989529	1994	71	>55	NP	Complete	Yes	No	Cohort III	Left	18.05	10	40	50		majority
64434	Cancer Free at 16 years	3	FALSE	Study Sample	64.35	2174	254	457	1971	2428	1644.61	1767.65	15505.9	0.106064	0.990431	1995	50	45-55	PDWA	Partial	Yes	No	Cohort III	Right	22.92	30	30	40		majority
64434	Cancer Free at 16 years	2	FALSE	Study Sample	59.67	1669	262	294	1637	1931	1731.7	1935.78	7158.28	0.241916	0.985507	1995	50	45-55	PDWA	Partial	Yes	No	Cohort III	Right	22.92	30	30	40		majority
64582	ER positive	2	FALSE	Study Sample	39.44	1589	286	269	1606	1875	2424.89	2619.6	10377.1	0.233677	0.987903	1998	70	>55	AH	Partial	No	No	Cohort III	Left	5.69	20	40	40		majority
65079	ER negative	3	FALSE	Study Sample	62.27	5455	637	1712	4380	6092	216.67	260.626	5822.53	0.0372123	0.831325	1992	37	<45	NP	None	No	Yes	Cohort III	Left	9.42	20	60	20		fibroadenoma
65101	ER positive	3	FALSE	Study Sample	20.64	4673	345	1580	3438	5018	555.386	620.155	8583.1	0.0647069	0.917012	1992	51	45-55	NP	None	Yes	No	Cohort III	Left	9.13	20	40	40		majority
65146	ER positive	3	FALSE	Study Sample	62.7	1947	355	444	1858	2302	570.782	650.759	12436.9	0.0458943	0.945652	1996	48	45-55	PDWA	Partial	Yes	Yes	Cohort III	Left	7.03	30	50	20		majority
65147	Cancer Free at 16 years	4	FALSE	Study Sample	59.778	2311	371	554	2128	2682	355.949	425.167	15574.4	0.0228547	0.921053	1992	52	45-55	NP	Partial	No	Yes	Cohort III	Right	16.31	10	30	60		majority
65374	Cancer Free at 16 years	3	FALSE	Study Sample	66	2831	265	409	2687	3096	1393.13	1516.55	17239.7	0.0808096	0.990521	1994	47	45-55	NP	Partial	No	Yes	Cohort III	Right	24.71	30	60	10		fibroadenoma
65540	ER negative	3	FALSE	Study Sample	62.26	1658	277	453	1482	1935	1237.47	1358.65	11014.5	0.11235	0.986175	1997	52	45-55	PDWA	Partial	Yes	No	Cohort III	Left	5.7	20	50	30		majority
65582	ER positive	5	TRUE	Study Sample	19.971	995	1675	996	1674	2670	88.5356	117.161	6425.79	0.0137782	0.68593	1994	79	>55	NP	Complete	No	No	Cohort III	Left	3.06	10	10	80		majority
65647	ER positive	2	FALSE	Study Sample	40.04	2610	360	671	2299	2970	680.039	816.238	8248.76	0.0824413	0.94898	1993	49	45-55	NP	Partial	No	No	Cohort III	Right	4.51	10	40	50		majority
65770	ER positive	3	FALSE	Study Sample	60.69	2173	274	456	1991	2447	1390.26	1493.43	14696.5	0.0945985	0.986486	1994	40	<45	NP	Partial	Yes	Yes	Cohort III	Left	5.25	20	60	20		fibroadenoma
65770	ER positive	2	FALSE	Study Sample	59.976	1831	279	342	1768	2110	1670.31	1856.32	6430.14	0.259763	0.977477	1994	40	<45	NP	Partial	Yes	Yes	Cohort III	Left	5.25	20	60	20		fibroadenoma
66267	ER negative	3	FALSE	Study Sample	20.07	1211	956	646	1521	2167	208.65	234.911	12837	0.0162538	0.870036	1998	43	<45	NP	Partial	Yes	No	Cohort III	Left	4.31	10	50	40		majority
66414	ER negative	3	FALSE	Study Sample	63.49	4112	303	799	3616	4415	2169.47	2335.15	15744.9	0.137789	0.971074	1993	45	45-55	PDWA	None	Yes	No	Cohort III	Right	9.37	30	50	20	Bx	exceptions
66414	ER negative	2	FALSE	Study Sample	63.49	3181	316	1047	2450	3497	1601.47	1779.18	9340.49	0.171454	0.983806	1993	45	45-55	PDWA	None	Yes	No	Cohort III	Right	9.37	30	50	20	Bx	exceptions
66416	ER positive	5	FALSE	Study Sample	60.2	2585	311	329	2567	2896	705.409	781.193	18521.6	0.0380859	0.967611	1992	37	<45	NP	Complete	Yes	No	Cohort III	Right	8.97	10	80	10		majority
67570	ER positive	3	FALSE	Study Sample	62.04	3076	272	642	2706	3348	2248.18	2417.88	17329.4	0.129732	0.977169	1995	52	45-55	PDWA	None	No	No	Cohort III	Left	12.11	30	50	20		majority
67854	ER positive	3	FALSE	Study Sample	63.69	1563	272	328	1507	1835	1743.56	1867.57	15169.8	0.114936	0.982456	1999	49	45-55	NP		Not Available	Yes	Cohort III	Left	4.22	30	70	0		fibroadenoma
68043	ER negative	4	FALSE	Study Sample	60.3	1060	282	209	1133	1342	808.557	906.092	10784.2	0.0749759	0.970588	1997	63	>55	PDWA	Partial	Yes	No	Cohort III	Right	4.05	20	20	60	Inflammation	exceptions
68675	ER positive	3	FALSE	Study Sample	62.7	2641	265	443	2463	2906	1367.2	1486.91	14941.8	0.0915019	0.985782	2001	56	>55	AH	Partial	No	No	Cohort III	Left	3.78	40	20	40		majority
68829	ER positive	5	FALSE	Study Sample	59.34	1230	282	187	1325	1512	905.509	1000.93	10974.2	0.0825123	0.983539	1998	66	>55	PDWA	Complete	No	No	Cohort III.V	Left	7.58	10	10	80		majority
71229	ER positive	3	FALSE	Study Sample	63.72	1558	259	584	1233	1817	2332.47	2507.49	13847.6	0.168439	0.981043	2000	53	45-55	AH	Partial	Yes	No	Cohort III.V	Left	6.62	20	20	60		majority
71450	ER positive	3	FALSE	Study Sample	20.91	1074	323	320	1077	1397	488.709	542.21	14790.3	0.0330425	0.972112	1997	62	>55	NP	Partial	Yes	No	Cohort III.V	Left	6.02	20	40	40		majority
71450	ER positive	2	FALSE	Study Sample	59.04	2032	282	305	2009	2314	1795.67	1966.59	8385.98	0.214128	0.982833	1997	62	>55	NP	Partial	Yes	No	Cohort III.V	Left	6.02	20	40	40		majority
71459	ER positive	4	FALSE	Study Sample	39.932	1864	297	354	1807	2161	895.72	961.512	13047.9	0.0686484	0.976562	2000	79	>55	NP	Complete	No	Yes	Cohort III.V	Left	4.05	10	10	80		majority
71462	ER positive	3	FALSE	Study Sample	20.88	1427	271	398	1300	1698	480.707	530.145	11608	0.0414116	0.952381	1999	44	<45	PDWA	Partial	Yes	No	Cohort III.V	Left	1.79	20	20	60		majority
71972	Cancer Free at 16 years	5	FALSE	Study Sample	60.2	15277	2460	4894	12843	17737	186.824	232.028	5082.17	0.0367607	0.861723	1982	69	>55	NP	Complete	Yes	No	Cohort II	Left	18.83	10	70	20		majority
72719	Cancer Free at 16 years	5	TRUE	Study Sample	60.298	1875	1016	1025	1866	2891	73.8315	91.5967	7523.96	0.00981286	0.728571	1983	60	>55	PDWA	Partial	Yes	No	Cohort II	Right	17.76	20	30	50		majority
72892	Cancer Free at 16 years	2	FALSE	Study Sample	19.514	2266	354	854	1766	2620	631.305	741.204	9345.39	0.0675525	0.938095	1989	65	>55	PDWA	Partial	Yes	Yes	Cohort II	Right	27.92	10	80	10		majority
72892	Cancer Free at 16 years	4	FALSE	Study Sample	59.976	29007	346	3014	26339	29353	788.041	885.577	17632.2	0.0446932	0.976077	1989	65	>55	PDWA	Partial	Yes	Yes	Cohort II	Right	27.92	10	80	10		majority
73271	Cancer Free at 16 years	5	TRUE	Study Sample	39.975	1621	1606	1390	1837	3227	61.3697	73.8209	8496.25	0.00722315	0.746224	1979	63	>55	NP	Complete	Yes	No	Cohort I	Right	19.32	10	60	30		majority
74197	Cancer Free at 16 years	4	FALSE	Study Sample	60.016	2311	672	982	2001	2983	118.639	141.731	6013.81	0.0197277	0.846975	1985	66	>55	NP	Complete	No	Yes	Cohort II	Right	19.26	10	30	60		fibroadenoma
74312	Cancer Free at 16 years	5	FALSE	Study Sample	40.016	32323	429	3836	28916	32752	543.9	609.888	18385.5	0.029583	0.92623	1983	45	45-55	NP	Complete	Yes	No	Cohort II	Right	21.72	10	30	60		majority
75384	Cancer Free at 16 years	5	FALSE	Study Sample	59.976	6865	543	2102	5306	7408	270.531	308.526	8804.63	0.030726	0.869403	1991	65	>55	NP	Complete	No	No	Cohort II	Right	27.59	10	10	80		majority
76551	Cancer Free at 16 years	5	TRUE	Study Sample	60.016	3205	1051	1167	3089	4256	111.163	138.935	7767.69	0.014311	0.793814	1984	62	>55	NP	Complete	Yes	No	Cohort II	Bilateral	16.96	10	50	40		majority
77079	Cancer Free at 16 years	3	TRUE	Study Sample	19.84	2466	1039	1109	2396	3505	86.8031	104.356	5280.95	0.016437	0.76699	1986	51	45-55	PDWA	Partial	Yes	No	Cohort II	Left	18.81	20	70	10		majority
77184	Cancer Free at 16 years	5	TRUE	Study Sample	19.992	1086	928	731	1283	2014	64.8565	76.8073	10027.1	0.00646814	0.732484	1985	63	>55	NP	Complete	Yes	No	Cohort II	Left	17.13	10	50	40		majority
77722	Cancer Free at 16 years	3	FALSE	Study Sample	20.07	11008	868	3218	8658	11876	242.809	272.384	7714.49	0.0314743	0.90493	1991	58	>55	PDWA	Complete	Yes	No	Cohort II	Right	26.75	10	50	40		majority
78188	Cancer Free at 16 years	5	TRUE	Study Sample	59.974	81	864	268	677	945	29.1926	40.0741	1880.61	0.0155229	0.729858	1987	62	>55	NP	Partial	No	No	Cohort II	Left	29.5	10	20	70		majority
78461	Cancer Free at 16 years	4	FALSE	Study Sample	59.888	2509	683	717	2475	3192	240.847	285.639	10184.1	0.0236492	0.805195	1981	51	45-55	NP	Partial	Yes	No	Cohort I	Right	35.72	10	80	10		majority
78552	Cancer Free at 16 years	2	FALSE	Study Sample	19.871	20693	639	6467	14865	21332	627.267	744.439	4897.64	0.128075	0.955823	1984	51	45-55	NP	Complete	Yes	No	Cohort II	Right	20.6	10	40	50		majority
78913	ER positive	2	FALSE	Study Sample	40.032	2485	299	888	1896	2784	1608.91	1778.74	9368.8	0.17173	0.982533	1997	50	45-55	AH	Partial	No	No	Cohort III.V	Right	8.38	20	20	60		majority
79628	Cancer Free at 16 years	5	FALSE	Study Sample	59.892	2764	860	1239	2385	3624	120.656	145.627	9475.49	0.0127335	0.85098	1985	52	45-55	NP	Partial	Yes	No	Cohort II	Left	33.58	10	80	10		majority
80132	ER positive	5	TRUE	Study Sample	59.904	4237	2145	1941	4441	6382	118.395	159.16	3970.28	0.0298203	0.756032	1984	69	>55	NP	Partial	Yes	No	Cohort II	Right	2.17	10	40	50		majority
SampleA	Diluted Samples	4	FALSE	Non-study sample		4371	316	799	3888	4687	231.477	247.342	14938.2	0.0154957	0.893281	2007
SampleA	Diluted Samples	4	FALSE	Non-study sample		6088	276	694	5670	6364	310.952	333.556	15980.2	0.0194586	0.943723	2007
SampleA	Diluted Samples	4	FALSE	Non-study sample		13973	267	1079	13161	14240	553.254	592.065	19877.3	0.0278335	0.982379	2007
SampleA	Diluted Samples	4	FALSE	Non-study sample		1942	343	413	1872	2285	139.348	150.99	13070.7	0.0106612	0.875969	2007
SampleA	Diluted Samples	4	FALSE	Non-study sample		15618	261	926	14953	15879	693.254	741.706	19500.8	0.0355501	0.973094	2007
SampleA	Jodi's Group - FFPE extraction from Melody	4	FALSE	Non-study sample		1143	270	166	1247	1413	513.688	559.563	20805.6	0.0246899	0.960526	2007
SampleA	Jodi's Group - FFPE extraction from PRC/BAP	4	FALSE	Non-study sample		12330	270	1067	11533	12600	578.21	622.644	19577.6	0.0295343	0.965368	2007
SampleA	Jodi's Group - Frozen extraction from PRC/BAP	4	FALSE	Non-study sample		123	251	126	248	374	1833.3	1964.97	12670	0.144696	0.990909	2007
SampleA	Jodi's Group - FFPE extraction from PRC/BAP	5	FALSE	Non-study sample		12391	257	1086	11562	12648	558.205	591.399	17229.8	0.0323976	0.973094	2007
SampleA	Jodi's Group - Frozen extraction from PRC/BAP	5	FALSE	Non-study sample		161	250	164	247	411	2463.73	2612.17	14832	0.166109	0.986364	2007
SampleB	Jodi's Group - FFPE extraction from Melody	4	FALSE	Non-study sample		1015	281	188	1108	1296	638.015	694.076	13472	0.0473585	0.932773	2007
SampleB	Jodi's Group - FFPE extraction from PRC/BAP	4	FALSE	Non-study sample		5720	264	666	5318	5984	556.315	592.264	12077.9	0.0460607	0.990909	2007
SampleB	Jodi's Group - Frozen extraction from PRC/BAP	4	FALSE	Non-study sample		145	251	134	262	396	1701.19	1854.95	12549.3	0.13556	0.990783	2007
SampleC	Diluted Samples	4	FALSE	Non-study sample		4992	439	1409	4022	5431	171.785	185.136	20637	0.00832412	0.843284	2008
SampleC	Diluted Samples	4	FALSE	Non-study sample		4082	282	620	3744	4364	275.25	298.549	7082.86	0.0388614	0.936709	2008
SampleC	Diluted Samples	4	FALSE	Non-study sample		5723	274	1184	4813	5997	478.037	522.997	4170.39	0.114626	0.970213	2008
SampleC	Diluted Samples	4	FALSE	Non-study sample		2212	373	498	2087	2585	147.422	159.88	17774.7	0.00829395	0.844595	2008
SampleC	Diluted Samples	4	FALSE	Non-study sample		12536	267	1178	11625	12803	761.155	834.829	8352.11	0.0911332	0.973913	2008
SampleC	Jodi's Group - FFPE extraction from Melody	4	FALSE	Non-study sample		788	410	271	927	1198	278.082	307.92	8126.17	0.0342205	0.811502	2008
SampleC	Jodi's Group - FFPE extraction from PRC/BAP	4	FALSE	Non-study sample		22102	278	1560	20820	22380	764.531	813.053	26724.3	0.0286081	0.950413	2008
SampleC	Jodi's Group - Frozen extraction from PRC/BAP	4	FALSE	Non-study sample		173	265	147	291	438	1839.87	2003.73	26041	0.0706528	0.97807	2008
SampleC	Jodi's Group - FFPE extraction from PRC/BAP	5	FALSE	Non-study sample		14327	306	1034	13599	14633	675.118	712.242	15380.6	0.043894	0.923358	2008
SampleD	Jodi's Group - FFPE extraction from Melody	4	FALSE	Non-study sample		1323	300	307	1316	1623	589.961	634.733	23747.1	0.0248434	0.953668	2008
SampleD	Jodi's Group - FFPE extraction from PRC/BAP	4	FALSE	Non-study sample		2926	316	603	2639	3242	230.245	249.298	24525.8	0.00938788	0.86747	2008
SampleD	Jodi's Group - Frozen extraction from PRC/BAP	4	FALSE	Non-study sample		166	237	136	267	403	1498.67	1611.44	21266.5	0.0704709	0.985294	2008
HD_Mod_FFPE_Ref_St	Reference Control	3	FALSE	Non-study sample	45	1293	504	371	1426	1797	704.487	760.232	14188.8	0.0496509	0.590258	2018
HD_Mod_FFPE_Ref_St	Reference Control	4	FALSE	Non-study sample		722	510	208	1024	1232	678.396	726.593	20628.2	0.0328868	0.578348	2018
HD_Mod_FFPE_Ref_St	Reference Control	5	FALSE	Non-study sample		585	511	193	903	1096	994.981	1058.28	21032.8	0.0473061	0.571831	2018
NA12891	Reference Control	3	FALSE	Non-study sample	45	192	223	159	256	415	2083.79	2336.32	17732.7	0.117511	0.984694	2018
NA12891	Reference Control	2	FALSE	Non-study sample	43.75	143	220	145	218	363	1524.89	1665.44	8989.55	0.169629	0.989796	2018
NA12891	Reference Control	4	FALSE	Non-study sample		137	222	124	235	359	1971.24	2129.13	13479.1	0.146244	0.984694	2018
NA12891	Reference Control	5	FALSE	Non-study sample		151	219	147	223	370	2655.72	2856.47	15356.4	0.172939	0.994898	2018
